# Supplementary material for: Multidimensional structure and enhancement performance of modified graphene/carbon nanotube assemblies in tribological properties of polyimide nanocomposites
Source: Royal Society of Chemistry journal article supplement (doi:10.1039/c7ra02149f), 2017-01-01
Supplement: c7ra02149f1.pdf [file c7ra02149f1.pdf]

## **Electronic supplementary information**

# Multidimensional Structure and Enhancement Performance of Modified Graphene/Carbon Nanotube Assemblies in Tribological Properties of Polyimide Nanocomposites

Yuanshi Xin, Tongsheng Li,\* Fanglin Xu and Mingming Wang

*State Key Laboratory of Molecular Engineering of Polymers, Department of  
Macromolecular Science, Fudan University, Shanghai, 200433, P. R. China.*

\*Corresponding author. Tel & Tax: +86-021-51630401; E-mail: [lits@fudan.edu.cn](mailto:lits@fudan.edu.cn)

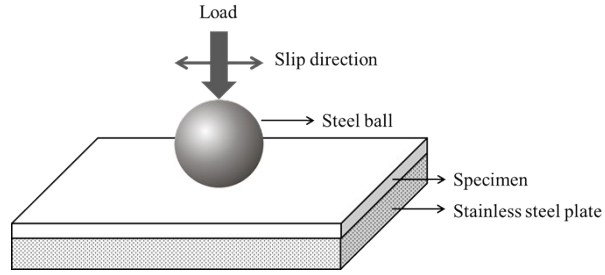

**Fig. S1** Schematic diagram of the contact configuration of the reciprocating friction and wear testing machine.

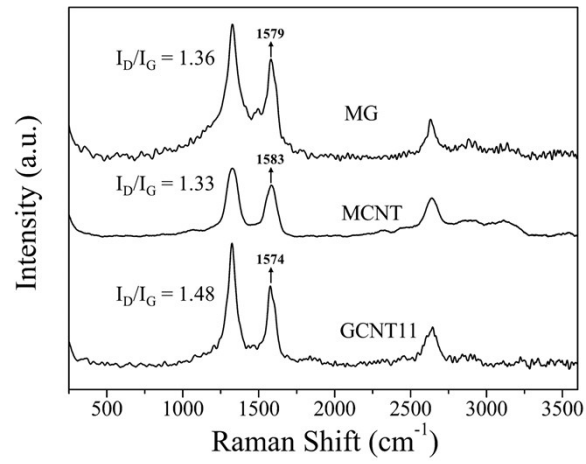

**Fig. S2** Raman spectra of MG, MCNT and GCNT11.

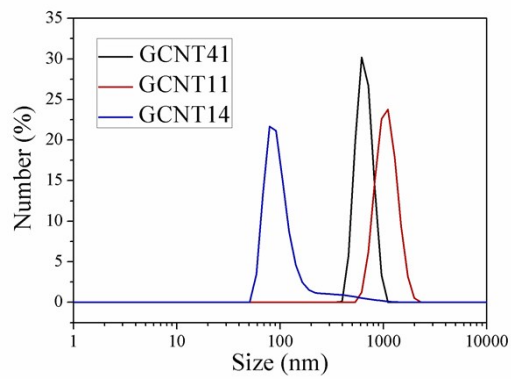

**Fig. S3** Size distribution by number of GCNT41, GCNT11 and GCNT14.

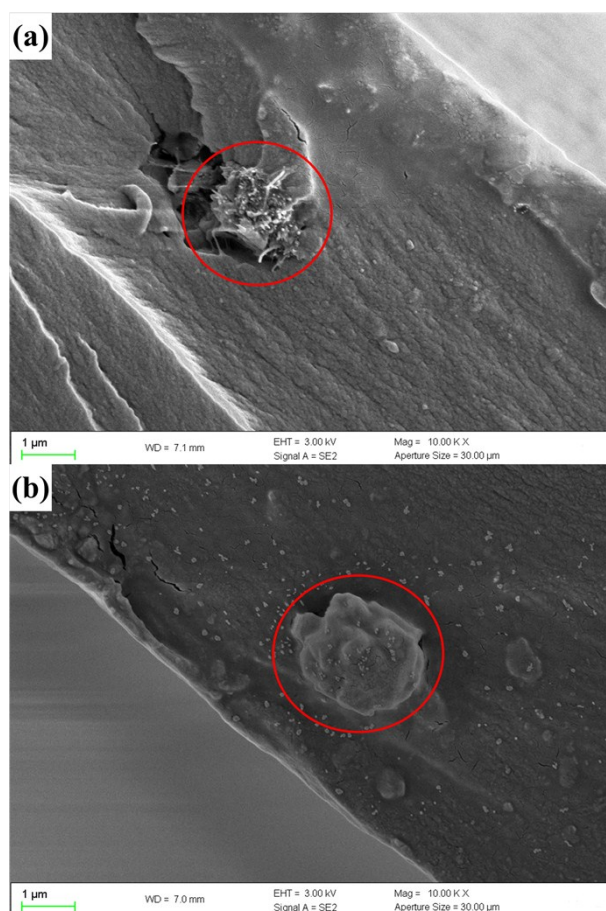

**Fig. S4** FESEM images showing (a) half-open graphene-CNT ball and (b) intact graphene-CNT ball outside the fracture surface of GCNT41/PI specimen.

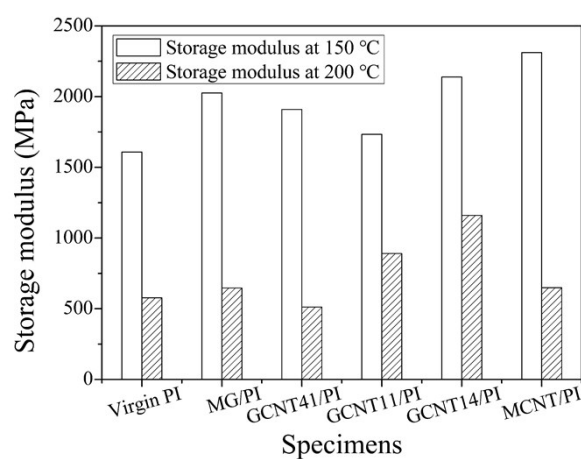

**Fig. S5** Storage modulus of virgin PI and PI composites at 150 °C and 200 °C.

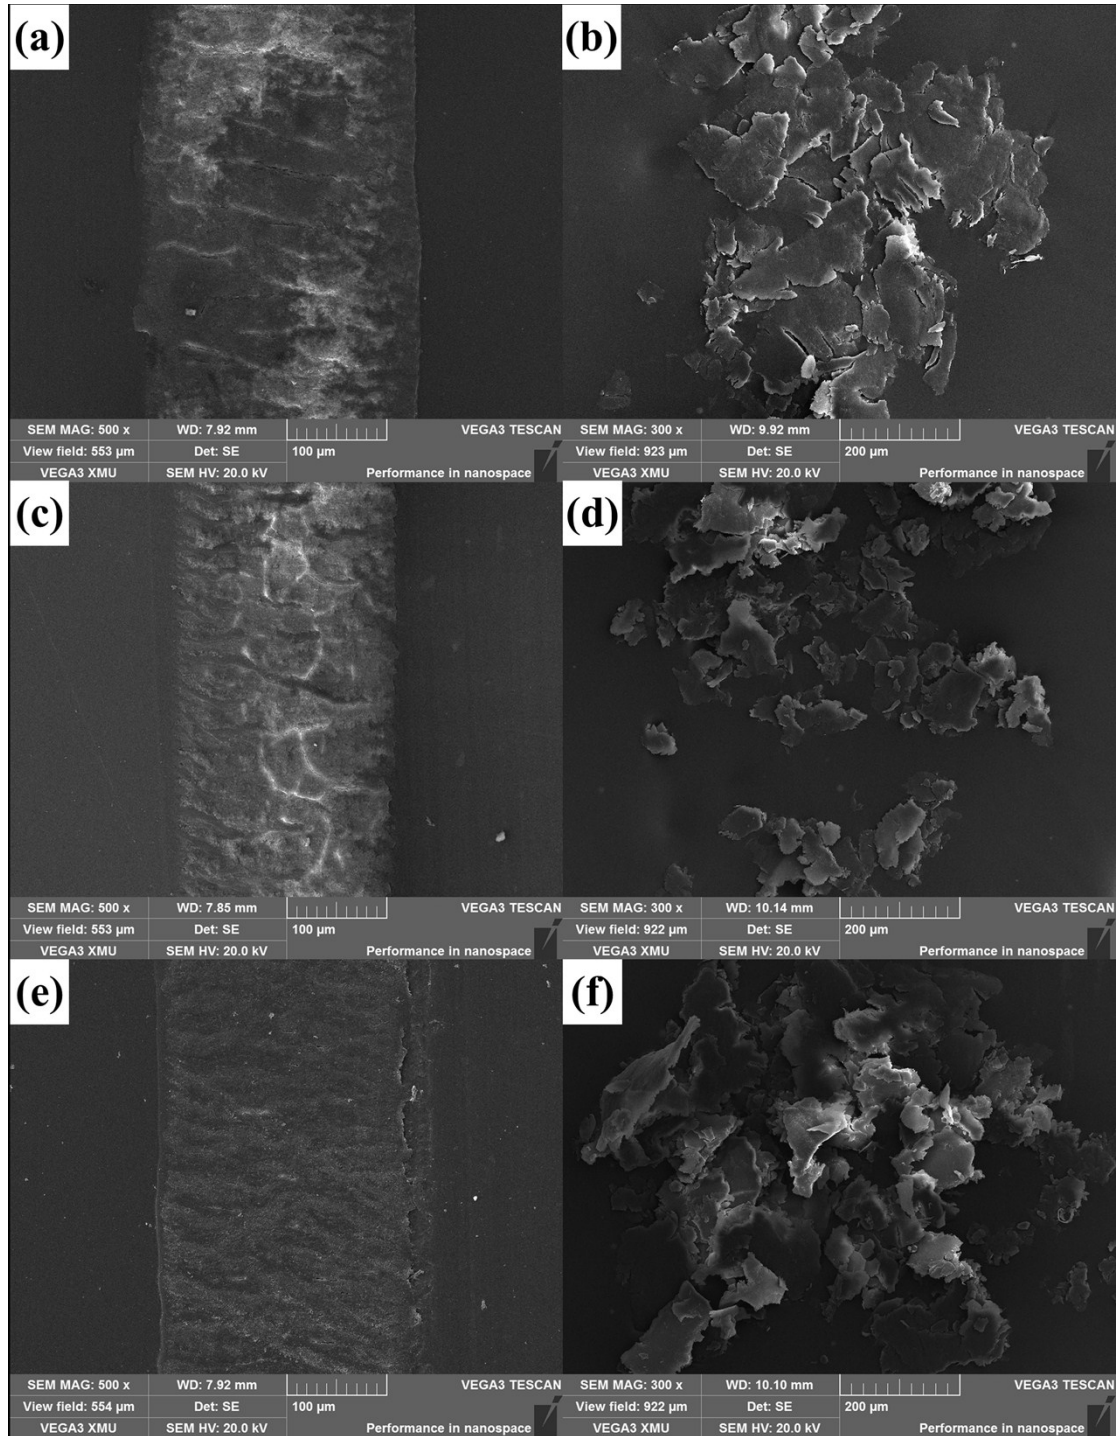

**Fig. S6** SEM images of worn surfaces of (a) virgin PI, (c) MG/PI and (e) MCNT/PI specimens. SEM images of wear debris of (b) virgin PI, (d) MG/PI and (f) MCNT/PI specimens.
